# Supplementary material
Source: HighWire-hosted journal article supplement (https://tsaco.bmj.com/content/3/1/e000256)
Supplement: inline-supplementary-material-1 [file inline-supplementary-material-1.pdf]

Tikur Anbessa Post-Injury Follow-Up Questionnaire

---

|                     |                                        |                                                              |                                                                     |
|---------------------|----------------------------------------|--------------------------------------------------------------|---------------------------------------------------------------------|
| Patient Name:       |                                        | MRN:                                                         |                                                                     |
| Number of Attempts: |                                        | Date of Interview:                                           |                                                                     |
| Respondent          | <input type="checkbox"/> Patient alone | <input type="checkbox"/> Relative, friend or caretaker alone | <input type="checkbox"/> Patient plus relative, friend or caretaker |

| #                                      | Question                                                                                                                            | Answer                                                      |                  |
|----------------------------------------|-------------------------------------------------------------------------------------------------------------------------------------|-------------------------------------------------------------|------------------|
| <b>0. Survival</b>                     |                                                                                                                                     |                                                             |                  |
| 0.1                                    | Is the patient currently alive?                                                                                                     | <input type="checkbox"/> Yes<br><input type="checkbox"/> No | If yes, go to #1 |
| 0.2                                    | If no, when did the patient die?                                                                                                    |                                                             |                  |
| <b>1. Consciousness</b>                |                                                                                                                                     |                                                             |                  |
| 1.1                                    | Is the head-injured person able to obey simple commands or say any words?                                                           | <input type="checkbox"/> Yes<br><input type="checkbox"/> No | If no, go to #10 |
| <b>2. Independence at home:</b>        |                                                                                                                                     |                                                             |                  |
| 2.1                                    | Is the assistance of another person at home essential every day for some basic activities of daily living like dressing and eating? | <input type="checkbox"/> Yes<br><input type="checkbox"/> No | If no, go to #3  |
| 2.2                                    | Do they need frequent help of someone to be around at home most of the time?                                                        | <input type="checkbox"/> Yes<br><input type="checkbox"/> No |                  |
| 2.3                                    | Was the patient independent at home before the injury?                                                                              | <input type="checkbox"/> Yes<br><input type="checkbox"/> No |                  |
| <b>3-4. Independence outside home:</b> |                                                                                                                                     |                                                             |                  |
| 3.1                                    | Are they able to shop without assistance?                                                                                           | <input type="checkbox"/> Yes<br><input type="checkbox"/> No |                  |
| 3.2                                    | Were they able to shop without assistance before?                                                                                   | <input type="checkbox"/> Yes<br><input type="checkbox"/> No |                  |
| 4.1                                    | Are they able to travel locally without assistance?                                                                                 | <input type="checkbox"/> Yes<br><input type="checkbox"/> No |                  |
| 4.2                                    | Were they able to travel locally without assistance before the injury?                                                              | <input type="checkbox"/> Yes<br><input type="checkbox"/> No |                  |

|                                          |                                                                                                                                   |                                                                                                                                                                                                                                                   |                  |
|------------------------------------------|-----------------------------------------------------------------------------------------------------------------------------------|---------------------------------------------------------------------------------------------------------------------------------------------------------------------------------------------------------------------------------------------------|------------------|
| <b>5. Work:</b>                          |                                                                                                                                   |                                                                                                                                                                                                                                                   |                  |
| 5.1                                      | Are they currently able to work (or look after others at home) to their previous capacity?                                        | <input type="checkbox"/> Yes<br><input type="checkbox"/> No                                                                                                                                                                                       | If yes, go to #6 |
| 5.2                                      | How restricted are they?                                                                                                          | <input type="checkbox"/> Reduced work capacity<br><input type="checkbox"/> Able to work only in a sheltered workshop or non-competitive job or currently unable to work                                                                           |                  |
| 5.3                                      | Does the level of restriction represent a change in respect to the pre-trauma situation?                                          | <input type="checkbox"/> Yes<br><input type="checkbox"/> No                                                                                                                                                                                       |                  |
| <b>6. Social and Leisure activities:</b> |                                                                                                                                   |                                                                                                                                                                                                                                                   |                  |
| 6.1                                      | Are they able to resume regular social and leisure activities outside home?                                                       | <input type="checkbox"/> Yes<br><input type="checkbox"/> No                                                                                                                                                                                       | If yes, go to #7 |
| 6.2                                      | What is the extent of restriction on their social and leisure activities?                                                         | <input type="checkbox"/> Participate a bit less: at least half as often as before injury<br><input type="checkbox"/> Participate much less: less than half as often<br><input type="checkbox"/> Unable to participate: rarely, if ever, take part |                  |
| 6.3                                      | Does the extent of restriction in regular social and leisure activities outside home represent a change in respect or pre-trauma? | <input type="checkbox"/> Yes<br><input type="checkbox"/> No                                                                                                                                                                                       |                  |

| <b>7. Family and friendships:</b>  |                                                                                               |                                                                                                                                                                                                     |                 |
|------------------------------------|-----------------------------------------------------------------------------------------------|-----------------------------------------------------------------------------------------------------------------------------------------------------------------------------------------------------|-----------------|
| 7.1                                | Has there been family or friendship disruption due to psychological problems?                 | <input type="checkbox"/> Yes<br><input type="checkbox"/> No                                                                                                                                         | If no, go to #8 |
| 7.2                                | What has been the extent of disruption or strain?                                             | <input type="checkbox"/> Occasional - less than weekly<br><input type="checkbox"/> Frequent - once a week or more, but not intolerable<br><input type="checkbox"/> Constant - daily and intolerable |                 |
| 7.3                                | Does the level of disruption or strain represent a change in respect to pre-trauma situation? | <input type="checkbox"/> Yes<br><input type="checkbox"/> No                                                                                                                                         |                 |
| <b>8-9. Return to normal life:</b> |                                                                                               |                                                                                                                                                                                                     |                 |
| 8.1                                | Are there any other current problems relating to the injury which affect daily life?          | <input type="checkbox"/> Yes<br><input type="checkbox"/> No                                                                                                                                         | If no, go to #9 |
| 8.2                                | If similar problems were present before the injury, have these become markedly worse?         | <input type="checkbox"/> Yes<br><input type="checkbox"/> No                                                                                                                                         |                 |
| 9.1                                | What is the most important factor in outcome?                                                 |                                                                                                                                                                                                     |                 |
| <b>10. Work Status</b>             |                                                                                               |                                                                                                                                                                                                     |                 |
| 10.1                               | What type of work did the patient do before their injury?                                     |                                                                                                                                                                                                     |                 |
| 10.2                               | How much money per month did the patient earn before their injury?                            |                                                                                                                                                                                                     |                 |
| 10.3                               | What type of work does the patient do now?                                                    |                                                                                                                                                                                                     |                 |
| 10.4                               | How much money per month does the patient earn now?                                           |                                                                                                                                                                                                     |                 |

| <b>11. Follow-up care</b> |                                                                                                                          |                                                             |  |
|---------------------------|--------------------------------------------------------------------------------------------------------------------------|-------------------------------------------------------------|--|
| 11.1                      | How many times has the patient returned to the hospital or clinic for outpatient follow-up care related to their injury? |                                                             |  |
| 11.2                      | How many times has the patient returned to the Emergency Department for issues related to their injury?                  |                                                             |  |
| 11.3                      | How many times has the patient been readmitted to the hospital for issues related to their injury?                       |                                                             |  |
| 11.4                      | Does the patient still need medical care for issues related to their injury?                                             | <input type="checkbox"/> Yes<br><input type="checkbox"/> No |  |
|                           | If yes, what issues?                                                                                                     |                                                             |  |

Total time to administer survey:
